# Supplementary material
Source: publisher figshare collection journal article supplement (https://acs.figshare.com/ndownloader/files/15610550)
Supplement: Supplementary file 1 [file 15610550]

## Supplementary Information

### **Rapid NMR Relaxation Measurements Using Optimal Non-Uniform Sampling of Multi-Dimensional Accordion Data Analyzed by a Sparse Reconstruction Method**

Göran Carlström,<sup>1</sup> Filip Elvander,<sup>2</sup> Johan Swärd,<sup>2</sup> Andreas Jakobsson<sup>2,\*</sup> and Mikael Akke<sup>3,\*</sup>

<sup>1</sup> Centre for Analysis and Synthesis, Department of Chemistry, Lund University, Box 124, SE-22100 Lund, Sweden

<sup>2</sup> Department of Mathematical Statistics, Lund University, Box 118, SE-22100 Lund, Sweden

<sup>3</sup> Biophysical Chemistry, Center for Molecular Protein Science, Department of Chemistry, Lund University, Box 124, SE-22100 Lund, Sweden

## Pulse Sequence

The constant-time accordion pulse sequence follows closely the  $R_1$  accordion sequence published by Mandel & Palmer<sup>1</sup> and is shown in Figure S1. The present implementation differs from the previous one in that z-axis pulsed field gradients were used for artifact suppression and gradient-enhanced PEP reverse polarization-transfer. The order of the  $^{15}\text{N}$  and  $^1\text{H}$   $180^\circ$  pulses in the constant time period was reversed compared to Figure 1C in Mandel & Palmer, so in our case we apply the  $^{15}\text{N}$  pulse before the  $^1\text{H}$  pulse. We have also added a water flip-back pulse at the start of the sequence and allowed for the use of selective pulses on  $\text{H}_2\text{O}$  during the relaxation period  $T_k$ , to aid in solvent suppression.

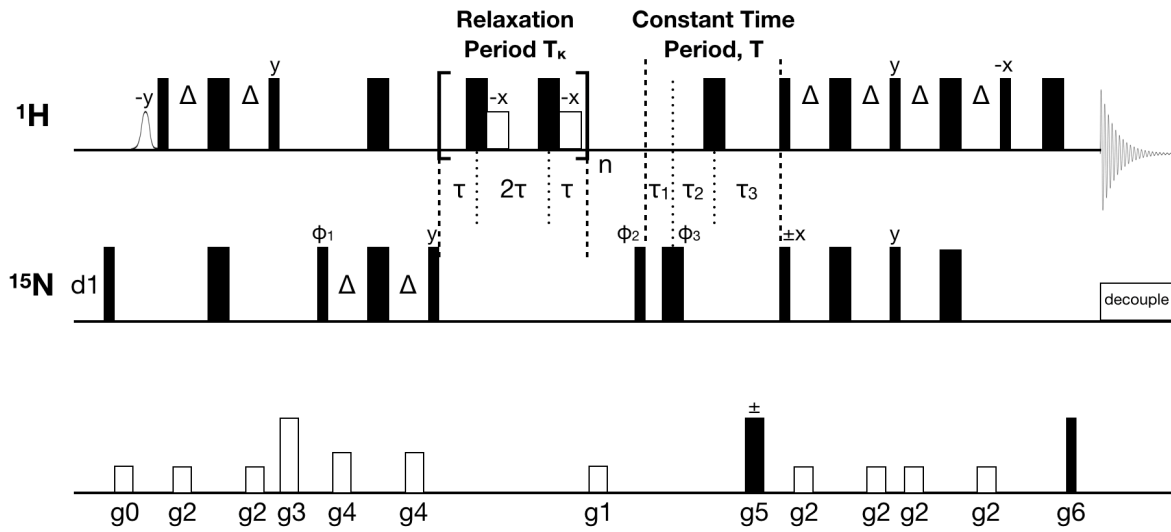

**Figure S1.** Pulse sequence for proton detected  $^{15}\text{N}$  inversion recovery experiment used for accordion NUS. Thin (thick) black bars correspond to  $90^\circ$  ( $180^\circ$ ) non-selective pulses. All pulses have phase  $x$ , unless otherwise indicated. The open bell-shaped pulse at the beginning of the sequence and the open bars in the relaxation period are selective pulses on the water resonance.  $\Delta = 1/(4J_{\text{HN}})$ , where  $J_{\text{HN}}$  is the one-bond scalar coupling constant. The phase cycle is  $\phi_1 = (x - x)$ ,  $\phi_2 = (y)$ ,  $\phi_3 = (x x y y - x - x - y - y)$ , receiver =  $(x - x - x x)$ . Gradient enhanced PEP polarization transfer is achieved by acquiring a second data set with inversion of the phase of the  $^{15}\text{N}$   $90^\circ$  pulse indicated with  $\pm x$ , and gradient  $g_5$ . The gradients  $g_5$  and  $g_6$  are used for coherence selection. The phase  $\phi_2$  and the receiver phase are inverted for each  $t_1$ -increment. The gradient times and levels are  $g_0$ : 1 ms, 8.9 G  $\text{cm}^{-1}$ ;  $g_1$ : 1 ms, 8.9 G  $\text{cm}^{-1}$ ;  $g_2$ : 0.5 ms, 7.1 G  $\text{cm}^{-1}$ ;  $g_3$ : 1 ms, 44.4 G  $\text{cm}^{-1}$ ;  $g_4$ : 0.5 ms, 14.2 G  $\text{cm}^{-1}$ ;  $g_5$ : 1.25 ms, 53.2 G  $\text{cm}^{-1}$ ;  $g_6$ : 0.125 ms, 53.8 G  $\text{cm}^{-1}$ .

The total relaxation delay  $T_k = n \cdot 4 \cdot \tau$ , where  $n$  is the sampled point number, and

$$\tau = \frac{\kappa \cdot \Delta t_1}{4}$$

The total constant-time delay  $T = \tau_1 + \tau_2 + \tau_3$ , where

$$\tau_1 = \frac{T - t_1}{2}$$

$$\tau_2 = \frac{T}{2} - \Delta$$

$$\tau_3 = \Delta + \frac{t_1}{2}$$

The experiment was performed on an Agilent Varian VNMRs 600 MHz instrument using a 5 mm HCN triple resonance room temperature probe. The uniformly sampled data were acquired with a spectral width of 8012.8 Hz, sampled over 1920 complex data points, in the direct dimension ( $t_2$ ). The forward and reverse accordion experiments were acquired interleaved, with the two experiments for each  $t_1$  increment acquired in pairs.

One pair (forward and reverse) of accordion experiments was acquired at 25 °C with a spectral width of 2000 Hz in the indirect dimension ( $t_1$ ), 220  $t_1$  points, 56 transients, recycle delay  $d1 = 2$  s, constant time delay  $T = 110$  ms, and with  $\kappa = 18$ , giving  $\Delta T_\kappa = 9$  ms ( $\tau = 2.25$  ms). The total acquisition time was 44.5 hours.

Another pair was acquired at 28 °C with a spectral width of 1823.4 Hz in the indirect dimension ( $t_1$ ), 128  $t_1$  points, 8 transients, recycle delay  $d1 = 2$  s, constant time delay  $T = 70$  ms, and with  $\kappa = 32$ , giving  $\Delta T_\kappa = 17.55$  ms ( $\tau = 4.39$  ms). The total acquisition time was 3h 49 min. This experiment was used in the comparison with results from the conventional experiment.

## Designed NUS Scheme

DSURE analysis of column 1580 of the forward accordion inversion recovery experiment for galectin-3C results in identification of seven signals. Three residues (Tyr247, Asn229 and Phe159) have their maximum intensity in this column, and it is used for determination of the  $R_1$ -values for these residues. The decay rates and RMSE for Tyr247 are presented in the main text, and Figure S3 shows results for Asn229 and Phe159.

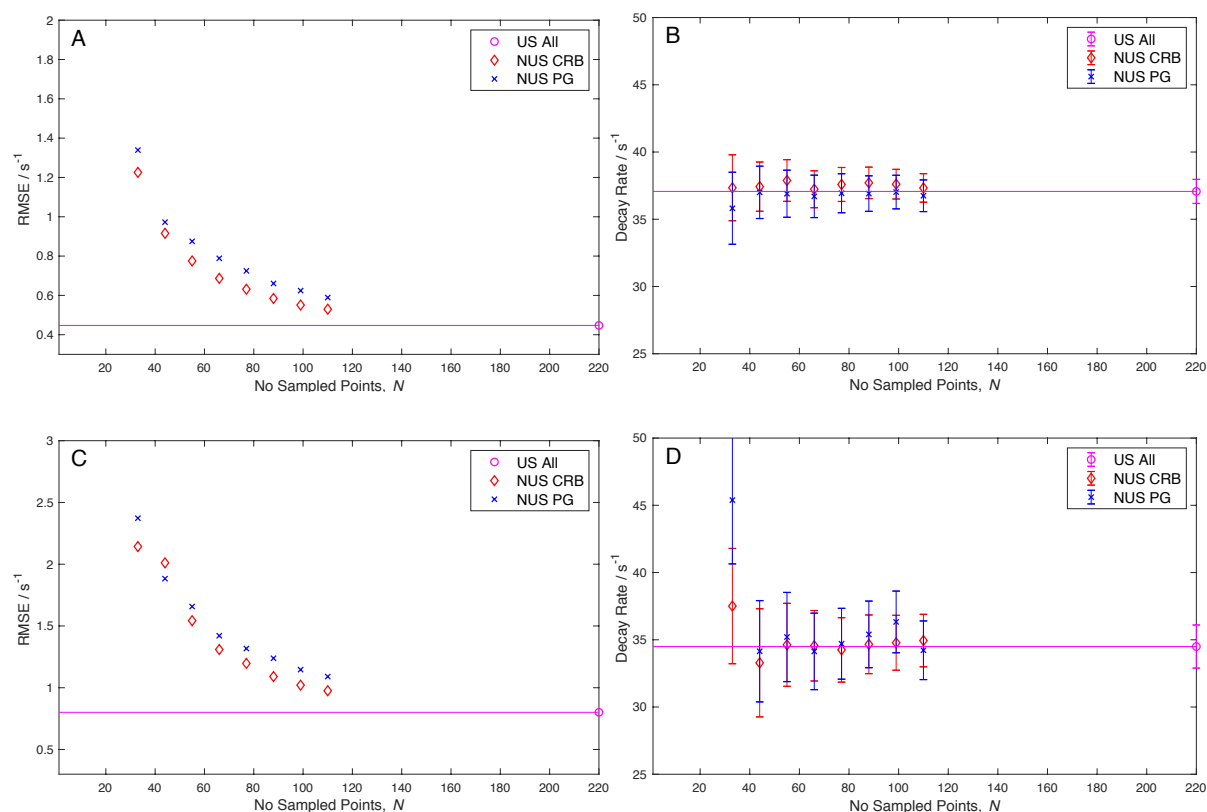

**Figure S2.** Performance comparison of designed and standard NUS schemes. (A) RMSE of the decay rate constants for Asn229 as a function of  $N$  for designed (CRB) and Poisson-gap (PG) NUS schemes. (B) estimated decay rate constant for Asn229 as a function of  $N$ . (C) RMSE of the decay rate constants for Phe159 as a function of  $N$  for designed (CRB) and Poisson-gap (PG) NUS schemes. (D) estimated decay rate constant for Phe159 as a function of  $N$ . Error bars correspond to the 95% confidence interval,  $2 \cdot \text{RMSE}$ .
